# Supplementary material for: Genetic structure of Trifolium pratense populations in a cityscape
Source: PeerJ. 2023 Sep 5;11:e15927. doi: 10.7717/peerj.15927 (PMC10487591; doi:10.7717/peerj.15927)
Supplement: Supplemental Information 1 [file peerj-11-15927-s001.xlsx]

## Sheet: 807 
Lane 2	Lane 2	Lane 2	Lane 2	Lane 2	Lane 2	Lane 3	Lane 3	Lane 3	Lane 3	Lane 3	Lane 3	Lane 4	Lane 4	Lane 4	Lane 4	Lane 4	Lane 4	Lane 5	Lane 5	Lane 5	Lane 5	Lane 5	Lane 5	Lane 6	Lane 6	Lane 6	Lane 6	Lane 6	Lane 6	Lane 7	Lane 7	Lane 7	Lane 7	Lane 7	Lane 7	Lane 8	Lane 8	Lane 8	Lane 8	Lane 8	Lane 8	Lane 9	Lane 9	Lane 9	Lane 9	Lane 9	Lane 9	Lane 10	Lane 10
Band No	Volume	Vol+BkGnd	Calib Vol(ug)	Base Pairs	Rf	Band No	Volume	Vol+BkGnd	Calib Vol(ug)	Base Pairs	Rf	Band No	Volume	Vol+BkGnd	Calib Vol(ug)	Base Pairs	Rf	Band No	Volume	Vol+BkGnd	Calib Vol(ug)	Base Pairs	Rf	Band No	Volume	Vol+BkGnd	Calib Vol(ug)	Base Pairs	Rf	Band No	Volume	Vol+BkGnd	Calib Vol(ug)	Base Pairs	Rf	Band No	Volume	Vol+BkGnd	Calib Vol(ug)	Base Pairs	Rf	Band No	Volume	Vol+BkGnd	Calib Vol(ug)	Base Pairs	Rf	Band No	Volume
																		1	606638	606638	-	526.275	0.64	1	740808	740808	-	526.275	0.64													1	558981	558981	-	3000	0.185	1	374025
																		2	531296	531296	-	264.269	0.755																			2	340432	340432	-	2000	0.286	2	807021
																																										3	313120	313120	-	1500	0.363
																																										4	298438	298438	-	1200	0.434
																																										5	323622	323622	-	1000	0.479
																																										6	122305	122305	-	900	0.516
																																										7	148945	148945	-	800	0.546
																																										8	196208	196208	-	700	0.578
																																										9	148829	148829	-	600	0.61
																																										10	353897	353897	-	500	0.651
																																										11	98058	98058	-	400	0.693
																																										12	152619	152619	-	300	0.737
																																										13	318912	318912	-	200	0.792
																																										14	199430	199430	-	100	0.851
Lane 1	Lane 1	Lane 1	Lane 1	Lane 1	Lane 1	Lane 2	Lane 2	Lane 2	Lane 2	Lane 2	Lane 2	Lane 3	Lane 3	Lane 3	Lane 3	Lane 3	Lane 3	Lane 4	Lane 4	Lane 4	Lane 4	Lane 4	Lane 4	Lane 5	Lane 5	Lane 5	Lane 5	Lane 5	Lane 5	Lane 6	Lane 6	Lane 6	Lane 6	Lane 6	Lane 6	Lane 7	Lane 7	Lane 7	Lane 7	Lane 7	Lane 7	Lane 8	Lane 8	Lane 8	Lane 8	Lane 8	Lane 8	Lane 9	Lane 9
Band No	Volume	Vol+BkGnd	Calib Vol(ug)	Base Pairs	Rf	Band No	Volume	Vol+BkGnd	Calib Vol(ug)	Base Pairs	Rf	Band No	Volume	Vol+BkGnd	Calib Vol(ug)	Base Pairs	Rf	Band No	Volume	Vol+BkGnd	Calib Vol(ug)	Base Pairs	Rf	Band No	Volume	Vol+BkGnd	Calib Vol(ug)	Base Pairs	Rf	Band No	Volume	Vol+BkGnd	Calib Vol(ug)	Base Pairs	Rf	Band No	Volume	Vol+BkGnd	Calib Vol(ug)	Base Pairs	Rf	Band No	Volume	Vol+BkGnd	Calib Vol(ug)	Base Pairs	Rf	Band No	Volume
1	1566554	1566554	-	907.346	0.441							1	7438840	7438840	-	466.481	0.58	1	7396462	7396462	-	490.956	0.571	1	109863	109863	-	555.875	0.547	1	591670	591670	-	680.748	0.507	1	103855	103855	-	466.481	0.58	1	167253	167253	-	490.956	0.571	1	32531
2	7282566	7282566	-	511.862	0.564																			2	7585437	7585437	-	354.399	0.628	2	7817365	7817365	-	490.956	0.571													2	3205415
																																																3	945851
																																																4	556023
																																																5	39981
																																																6	299283
																																																7	752122
																																																8	28693
																																																9	791245
																																																10	43208
																																																11	496222
																																																12	728813
																																																13	701180
																																																14	5558602
[truncated: 46 more columns]

## Sheet: 812
Lane 1	Lane 1	Lane 1	Lane 1	Lane 1	Lane 1	Lane 2	Lane 2	Lane 2	Lane 2	Lane 2	Lane 2	Lane 3	Lane 3	Lane 3	Lane 3	Lane 3	Lane 3	Lane 4	Lane 4	Lane 4	Lane 4	Lane 4	Lane 4	Lane 5	Lane 5	Lane 5	Lane 5	Lane 5	Lane 5	Lane 6	Lane 6	Lane 6	Lane 6	Lane 6	Lane 6	Lane 7	Lane 7	Lane 7	Lane 7	Lane 7	Lane 7	Lane 8	Lane 8	Lane 8	Lane 8	Lane 8	Lane 8	Lane 9	Lane 9
Band No	Volume	Vol+BkGnd	Calib Vol(ug)	Base Pairs	Rf	Band No	Volume	Vol+BkGnd	Calib Vol(ug)	Base Pairs	Rf	Band No	Volume	Vol+BkGnd	Calib Vol(ug)	Base Pairs	Rf	Band No	Volume	Vol+BkGnd	Calib Vol(ug)	Base Pairs	Rf	Band No	Volume	Vol+BkGnd	Calib Vol(ug)	Base Pairs	Rf	Band No	Volume	Vol+BkGnd	Calib Vol(ug)	Base Pairs	Rf	Band No	Volume	Vol+BkGnd	Calib Vol(ug)	Base Pairs	Rf	Band No	Volume	Vol+BkGnd	Calib Vol(ug)	Base Pairs	Rf	Band No	Volume
1	512310	512310	-	445.685	0.664	1	1523401	1523401	-	781.49	0.56	1	9547376	9547376	-	830.727	0.546	1	1480583	1480583	-	754.324	0.567	1	747296	747296	-	754.324	0.567	1	66656	66656	-	445.685	0.664	1	1979957	1979957	-	830.727	0.546	1	1542511	1542511	-	807.091	0.553	1	27058
2	5318365	5318365	-	329.536	0.723	2	195200	195200	-	505.897	0.642	2	734142	734142	-	600	0.611	2	27609	27609	-	466.387	0.656	2	62505	62505	-	574.444	0.619	2	1293717	1293717	-	300	0.738	2	93166	93166	-	485.624	0.649	2	178010	178010	-	505.897	0.642	2	3334868
						3	1125714	1125714	-	316.24	0.73	3	6146420	6146420	-	428.702	0.671							3	6576847	6576847	-	316.24	0.73													3	1066558	1066558	-	329.536	0.723	3	1030234
																																																4	652858
																																																5	22822
																																																6	299570
																																																7	889321
																																																8	62404
																																																9	963896
																																																10	59901
																																																11	599347
																																																12	950555
																																																13	857755
																																																14	4499707
Lane 1	Lane 1	Lane 1	Lane 1	Lane 1	Lane 1	Lane 2	Lane 2	Lane 2	Lane 2	Lane 2	Lane 2	Lane 3	Lane 3	Lane 3	Lane 3	Lane 3	Lane 3	Lane 4	Lane 4	Lane 4	Lane 4	Lane 4	Lane 4	Lane 5	Lane 5	Lane 5	Lane 5	Lane 5	Lane 5	Lane 6	Lane 6	Lane 6	Lane 6	Lane 6	Lane 6	Lane 7	Lane 7	Lane 7	Lane 7	Lane 7	Lane 7	Lane 8	Lane 8	Lane 8	Lane 8	Lane 8	Lane 8	Lane 9	Lane 9
Band No	Volume	Vol+BkGnd	Calib Vol(ug)	Base Pairs	Rf	Band No	Volume	Vol+BkGnd	Calib Vol(ug)	Base Pairs	Rf	Band No	Volume	Vol+BkGnd	Calib Vol(ug)	Base Pairs	Rf	Band No	Volume	Vol+BkGnd	Calib Vol(ug)	Base Pairs	Rf	Band No	Volume	Vol+BkGnd	Calib Vol(ug)	Base Pairs	Rf	Band No	Volume	Vol+BkGnd	Calib Vol(ug)	Base Pairs	Rf	Band No	Volume	Vol+BkGnd	Calib Vol(ug)	Base Pairs	Rf	Band No	Volume	Vol+BkGnd	Calib Vol(ug)	Base Pairs	Rf	Band No	Volume
1	1153803	1153803	-	825.919	0.589	1	2169850	2169850	-	800	0.597	1	1854855	1854855	-	783.22	0.602	1	1342798	1342798	-	800	0.597	1	4954144	4954144	-	437.223	0.716	1	2107589	2107589	-	800	0.597	1	1493920	1493920	-	776.852	0.604	1	2271724	2271724	-	476.2	0.701	1	639352
2	822544	822544	-	682.332	0.634	2	1778448	1778448	-	535.037	0.678	2	1254718	1254718	-	640.803	0.646	2	923960	923960	-	659.912	0.64							2	534703	534703	-	656.102	0.641	2	74089	74089	-	682.332	0.634	2	891703	891703	-	349.662	0.754	2	714336
3	1889541	1889541	-	513.29	0.686	3	1614629	1614629	-	367.474	0.746	3	847684	847684	-	486.759	0.697	3	983161	983161	-	513.29	0.686							3	1739168	1739168	-	476.2	0.701	3	2454076	2454076	-	494.7	0.694							3	745360
												4	875491	875491	-	354.074	0.752	4	1652794	1652794	-	319.297	0.768							4	822057	822057	-	367.474	0.746	4	708014	708014	-	349.662	0.754							4	753700
																																																5	1027860
																																																6	337604
																																																7	509617
																																																8	522626
																																																9	442757
																																																10	915496
																																																11	537838
																																																12	666837
																																																13	626051
																																																14	604802
Lane 1	Lane 1	Lane 1	Lane 1	Lane 1	Lane 1	Lane 2	Lane 2	Lane 2	Lane 2	Lane 2	Lane 2	Lane 6	Lane 6	Lane 6	Lane 6	Lane 6	Lane 6	Lane 7	Lane 7	Lane 7	Lane 7	Lane 7	Lane 7	Lane 9	Lane 9	Lane 9	Lane 9	Lane 9	Lane 9	Lane 10	Lane 10	Lane 10	Lane 10	Lane 10	Lane 10
Band No	Volume	Vol+BkGnd	Calib Vol(ug)	Base Pairs	Rf	Band No	Volume	Vol+BkGnd	Calib Vol(ug)	Base Pairs	Rf	Band No	Volume	Vol+BkGnd	Calib Vol(ug)	Base Pairs	Rf	Band No	Volume	Vol+BkGnd	Calib Vol(ug)	Base Pairs	Rf	Band No	Volume	Vol+BkGnd	Calib Vol(ug)	Base Pairs	Rf	Band No	Volume	Vol+BkGnd	Calib Vol(ug)	Base Pairs	Rf
1	58370	58370	-	424.644	0.636	1	4815304	4815304	-	382.57	0.653	1	34021	34021	-	471.57	0.619	1	5497690	5497690	-	449.921	0.627	1	70519	70519	-	3000	0.164	1	123014	123014	-	471.57	0.619
2	4675956	4675956	-	304.953	0.689																			2	1369333	1369333	-	2000	0.271
																								3	1670220	1670220	-	1500	0.348
																								4	399964	399964	-	1200	0.415
																								5	47481	47481	-	1000	0.451
																								6	227554	227554	-	900	0.482
																								7	270734	270734	-	800	0.508
																								8	335059	335059	-	700	0.54
																								9	620188	620188	-	600	0.565
																								10	32828	32828	-	500	0.607
																								11	416612	416612	-	400	0.646
																								12	525267	525267	-	300	0.691
																								13	549941	549941	-	200	0.74
																								14	3640285	3640285	-	100	0.796
Lane 1	Lane 1	Lane 1	Lane 1	Lane 1	Lane 1	Lane 2	Lane 2	Lane 2	Lane 2	Lane 2	Lane 2	Lane 3	Lane 3	Lane 3	Lane 3	Lane 3	Lane 3	Lane 4	Lane 4	Lane 4	Lane 4	Lane 4	Lane 4	Lane 5	Lane 5	Lane 5	Lane 5	Lane 5	Lane 5	Lane 6	Lane 6	Lane 6	Lane 6	Lane 6	Lane 6	Lane 7	Lane 7	Lane 7	Lane 7	Lane 7	Lane 7	Lane 8	Lane 8	Lane 8	Lane 8	Lane 8	Lane 8	Lane 9	Lane 9
Band No	Volume	Vol+BkGnd	Calib Vol(ug)	Base Pairs	Rf	Band No	Volume	Vol+BkGnd	Calib Vol(ug)	Base Pairs	Rf	Band No	Volume	Vol+BkGnd	Calib Vol(ug)	Base Pairs	Rf	Band No	Volume	Vol+BkGnd	Calib Vol(ug)	Base Pairs	Rf	Band No	Volume	Vol+BkGnd	Calib Vol(ug)	Base Pairs	Rf	Band No	Volume	Vol+BkGnd	Calib Vol(ug)	Base Pairs	Rf	Band No	Volume	Vol+BkGnd	Calib Vol(ug)	Base Pairs	Rf	Band No	Volume	Vol+BkGnd	Calib Vol(ug)	Base Pairs	Rf	Band No	Volume
						1	879523	879523	-	696.405	0.503	1	1152162	1152162	-	831.777	0.466	1	774020	774020	-	749.899	0.491	1	12072038	12072038	-	476.028	0.571	1	1398683	1398683	-	794.455	0.479	1	682391	682391	-	773.257	0.485	1	1526413	1526413	-	749.899	0.491	1	91561
						2	11451273	11451273	-	492.918	0.565	2	74082	74082	-	560.3	0.54	2	11486701	11486701	-	456.322	0.577							2	365893	365893	-	509.279	0.559	2	892749	892749	-	647.38	0.515	2	11234773	11234773	-	438.958	0.583	2	4574397
												3	1196753	1196753	-	370.243	0.608													3	11094571	11094571	-	338.384	0.62	3	493298	493298	-	476.028	0.571							3	90410
																																				4	11003508	11003508	-	309.159	0.633							4	2357133
																																																5	49223
																																																6	400399
																																																7	1261707
																																																8	498770
																																																9	722815
																																																10	43816
																																																11	1477616
																																																12	163731
																																																13	1089879
																																																14	8682644
Lane 1	Lane 1	Lane 1	Lane 1	Lane 1	Lane 1	Lane 2	Lane 2	Lane 2	Lane 2	Lane 2	Lane 2	Lane 3	Lane 3	Lane 3	Lane 3	Lane 3	Lane 3	Lane 4	Lane 4	Lane 4	Lane 4	Lane 4	Lane 4	Lane 5	Lane 5	Lane 5	Lane 5	Lane 5	Lane 5	Lane 6	Lane 6	Lane 6	Lane 6	Lane 6	Lane 6	Lane 7	Lane 7	Lane 7	Lane 7	Lane 7	Lane 7	Lane 8	Lane 8	Lane 8	Lane 8	Lane 8	Lane 8	Lane 9	Lane 9
Band No	Volume	Vol+BkGnd	Calib Vol(ug)	Base Pairs	Rf	Band No	Volume	Vol+BkGnd	Calib Vol(ug)	Base Pairs	Rf	Band No	Volume	Vol+BkGnd	Calib Vol(ug)	Base Pairs	Rf	Band No	Volume	Vol+BkGnd	Calib Vol(ug)	Base Pairs	Rf	Band No	Volume	Vol+BkGnd	Calib Vol(ug)	Base Pairs	Rf	Band No	Volume	Vol+BkGnd	Calib Vol(ug)	Base Pairs	Rf	Band No	Volume	Vol+BkGnd	Calib Vol(ug)	Base Pairs	Rf	Band No	Volume	Vol+BkGnd	Calib Vol(ug)	Base Pairs	Rf	Band No	Volume
1	854936	854936	-	658.012	0.561	1	1171431	1171431	-	726.125	0.543	1	730790	730790	-	717.338	0.545	1	1335859	1335859	-	695.711	0.551	1	588685	588685	-	739.468	0.539	1	1089149	1089149	-	757.594	0.535	1	874098	874098	-	757.594	0.535	1	998756	998756	-	780.854	0.529	1	533326
2	720864	720864	-	513.897	0.608	2	1886072	1886072	-	473.38	0.625	2	1510082	1510082	-	428.478	0.644	2	1726307	1726307	-	428.478	0.644	2	1422569	1422569	-	462.94	0.63	2	1059110	1059110	-	475.998	0.624	2	636356	636356	-	633.977	0.568	2	818230	818230	-	633.977	0.568	2	543964
3	868311	868311	-	400	0.655	3	318297	318297	-	226.548	0.724	3	1055885	1055885	-	272.777	0.703							3	867493	867493	-	343.188	0.676	3	823617	823617	-	343.188	0.676	3	955413	955413	-	452.489	0.634	3	713532	713532	-	475.998	0.624	3	550177
4	1933414	1933414	-	228.919	0.723																															4	1042369	1042369	-	280.626	0.699	4	2278160	2278160	-	327.284	0.681	4	589248
																																																5	718393
																																																6	321701
																																																7	336448
																																																8	362537
																																																9	349816
																																																10	618272
																																																11	355721
																																																12	576593
																																																13	651339
																																																14	605082
[truncated: 52 more columns]

## Sheet: 825
Lane 1	Lane 1	Lane 1	Lane 1	Lane 1	Lane 1	Lane 3	Lane 3	Lane 3	Lane 3	Lane 3	Lane 3	Lane 4	Lane 4	Lane 4	Lane 4	Lane 4	Lane 4	Lane 5	Lane 5	Lane 5	Lane 5	Lane 5	Lane 5	Lane 6	Lane 6	Lane 6	Lane 6	Lane 6	Lane 6	Lane 7	Lane 7	Lane 7	Lane 7	Lane 7	Lane 7	Lane 8	Lane 8	Lane 8	Lane 8	Lane 8	Lane 8	Lane 9	Lane 9	Lane 9	Lane 9	Lane 9	Lane 9	Lane 10	Lane 10
Band No	Volume	Vol+BkGnd	Calib Vol(ug)	Base Pairs	Rf	Band No	Volume	Vol+BkGnd	Calib Vol(ug)	Base Pairs	Rf	Band No	Volume	Vol+BkGnd	Calib Vol(ug)	Base Pairs	Rf	Band No	Volume	Vol+BkGnd	Calib Vol(ug)	Base Pairs	Rf	Band No	Volume	Vol+BkGnd	Calib Vol(ug)	Base Pairs	Rf	Band No	Volume	Vol+BkGnd	Calib Vol(ug)	Base Pairs	Rf	Band No	Volume	Vol+BkGnd	Calib Vol(ug)	Base Pairs	Rf	Band No	Volume	Vol+BkGnd	Calib Vol(ug)	Base Pairs	Rf	Band No	Volume
1	1219809	1219809	-	961.895	0.49	1	591424	591424	-	1025	0.468	1	1567083	1567083	-	1275.49	0.41	1	1154026	1154026	-	1079.41	0.454	1	4073641	4073641	-	1107.61	0.447	1	74872	74872	-	862.255	0.519	1	75648	75648	-	862.255	0.519	1	108220	108220	-	3000	0.172	1	41330
2	4159403	4159403	-	594.692	0.598	2	407993	407993	-	800	0.533	2	1084343	1084343	-	1079.41	0.454	2	49074	49074	-	655.638	0.576	2	391748	391748	-	830.663	0.526	2	4804029	4804029	-	594.692	0.598	2	420987	420987	-	655.638	0.576	2	1114411	1114411	-	2000	0.281	2	4562577
						3	33756	33756	-	573.868	0.606	3	52734	52734	-	632.853	0.584	3	1073566	1073566	-	331.974	0.707	3	80684	80684	-	676.093	0.569													3	1308992	1308992	-	1500	0.366
						4	4063303	4063303	-	319.495	0.713													4	981760	981760	-	373.891	0.685													4	401096	401096	-	1200	0.426
																																										5	60401	60401	-	1000	0.476
																																										6	241378	241378	-	900	0.51
																																										7	249410	249410	-	800	0.533
																																										8	254546	254546	-	700	0.561
																																										9	572779	572779	-	600	0.596
																																										10	19179	19179	-	500	0.634
																																										11	369997	369997	-	400	0.673
																																										12	450965	450965	-	300	0.724
																																										13	533240	533240	-	200	0.777
																																										14	498233	498233	-	100	0.825
Lane 1	Lane 1	Lane 1	Lane 1	Lane 1	Lane 1	Lane 2	Lane 2	Lane 2	Lane 2	Lane 2	Lane 2	Lane 3	Lane 3	Lane 3	Lane 3	Lane 3	Lane 3	Lane 4	Lane 4	Lane 4	Lane 4	Lane 4	Lane 4	Lane 7	Lane 7	Lane 7	Lane 7	Lane 7	Lane 7	Lane 8	Lane 8	Lane 8	Lane 8	Lane 8	Lane 8	Lane 9	Lane 9	Lane 9	Lane 9	Lane 9	Lane 9	Lane 11	Lane 11	Lane 11	Lane 11	Lane 11	Lane 11	Lane 12	Lane 12
Band No	Volume	Vol+BkGnd	Calib Vol(ug)	Base Pairs	Rf	Band No	Volume	Vol+BkGnd	Calib Vol(ug)	Base Pairs	Rf	Band No	Volume	Vol+BkGnd	Calib Vol(ug)	Base Pairs	Rf	Band No	Volume	Vol+BkGnd	Calib Vol(ug)	Base Pairs	Rf	Band No	Volume	Vol+BkGnd	Calib Vol(ug)	Base Pairs	Rf	Band No	Volume	Vol+BkGnd	Calib Vol(ug)	Base Pairs	Rf	Band No	Volume	Vol+BkGnd	Calib Vol(ug)	Base Pairs	Rf	Band No	Volume	Vol+BkGnd	Calib Vol(ug)	Base Pairs	Rf	Band No	Volume
1	6736388	6736388	-	797.24	0.604	1	279333	279333	-	974.348	0.551													1	10631245	10631245	-	637.266	0.652							1	1346857	1346857	-	3000	0.278	1	912745	912745	-	1065.43	0.53
2	1667156	1667156	-	400	0.732	2	550255	550255	-	817.168	0.597																									2	947620	947620	-	2000	0.376	2	453260	453260	-	775.978	0.611
						3	1974707	1974707	-	539.972	0.678																									3	706564	706564	-	1500	0.448	3	53400	53400	-	610.86	0.658
						4	2962070	2962070	-	368.692	0.745																									4	390147	390147	-	1200	0.506	4	1071947	1071947	-	400	0.732
																																				5	22979	22979	-	1000	0.544
																																				6	276513	276513	-	900	0.573
																																				7	529855	529855	-	800	0.603
																																				8	392306	392306	-	700	0.636
																																				9	343701	343701	-	600	0.661
																																				10	128097	128097	-	500	0.692
																																				11	954585	954585	-	400	0.732
																																				12	155950	155950	-	300	0.778
																																				13	627090	627090	-	200	0.825
																																				14	2483126	2483126	-	100	0.869
[truncated: 46 more columns]

## Sheet: 826
Lane 1	Lane 1	Lane 1	Lane 1	Lane 1	Lane 1	Lane 2	Lane 2	Lane 2	Lane 2	Lane 2	Lane 2	Lane 4	Lane 4	Lane 4	Lane 4	Lane 4	Lane 4	Lane 5	Lane 5	Lane 5	Lane 5	Lane 5	Lane 5	Lane 6	Lane 6	Lane 6	Lane 6	Lane 6	Lane 6	Lane 7	Lane 7	Lane 7	Lane 7	Lane 7	Lane 7	Lane 8	Lane 8	Lane 8	Lane 8	Lane 8	Lane 8	Lane 9	Lane 9	Lane 9	Lane 9	Lane 9	Lane 9	Lane 10	Lane 10
Band No	Volume	Vol+BkGnd	Calib Vol(ug)	Base Pairs	Rf	Band No	Volume	Vol+BkGnd	Calib Vol(ug)	Base Pairs	Rf	Band No	Volume	Vol+BkGnd	Calib Vol(ug)	Base Pairs	Rf	Band No	Volume	Vol+BkGnd	Calib Vol(ug)	Base Pairs	Rf	Band No	Volume	Vol+BkGnd	Calib Vol(ug)	Base Pairs	Rf	Band No	Volume	Vol+BkGnd	Calib Vol(ug)	Base Pairs	Rf	Band No	Volume	Vol+BkGnd	Calib Vol(ug)	Base Pairs	Rf	Band No	Volume	Vol+BkGnd	Calib Vol(ug)	Base Pairs	Rf	Band No	Volume
1	1329418	1329418	-	860.025	0.491							1	7418897	7418897	-	502.719	0.59	1	200492	200492	-	545.032	0.574	1	7816635	7816635	-	502.719	0.59	1	86662	86662	-	462.008	0.606	1	7645066	7645066	-	425.043	0.621	1	48207	48207	-	3000	0.182	1	929665
2	7277183	7277183	-	483.677	0.597													2	7611321	7611321	-	356.134	0.651																			2	3165389	3165389	-	2000	0.279	2	7791741
																																										3	928251	928251	-	1500	0.357
																																										4	596923	596923	-	1200	0.41
																																										5	19306	19306	-	1000	0.453
																																										6	629331	629331	-	900	0.48
																																										7	421651	421651	-	800	0.506
																																										8	43114	43114	-	700	0.534
																																										9	739758	739758	-	600	0.558
																																										10	32184	32184	-	500	0.591
																																										11	544994	544994	-	400	0.631
																																										12	730832	730832	-	300	0.677
																																										13	720571	720571	-	200	0.72
																																										14	5526478	5526478	-	100	0.766
Lane 1	Lane 1	Lane 1	Lane 1	Lane 1	Lane 1	Lane 2	Lane 2	Lane 2	Lane 2	Lane 2	Lane 2	Lane 3	Lane 3	Lane 3	Lane 3	Lane 3	Lane 3	Lane 4	Lane 4	Lane 4	Lane 4	Lane 4	Lane 4	Lane 5	Lane 5	Lane 5	Lane 5	Lane 5	Lane 5	Lane 6	Lane 6	Lane 6	Lane 6	Lane 6	Lane 6	Lane 7	Lane 7	Lane 7	Lane 7	Lane 7	Lane 7	Lane 8	Lane 8	Lane 8	Lane 8	Lane 8	Lane 8	Lane 9	Lane 9
Band No	Volume	Vol+BkGnd	Calib Vol(ug)	Base Pairs	Rf	Band No	Volume	Vol+BkGnd	Calib Vol(ug)	Base Pairs	Rf	Band No	Volume	Vol+BkGnd	Calib Vol(ug)	Base Pairs	Rf	Band No	Volume	Vol+BkGnd	Calib Vol(ug)	Base Pairs	Rf	Band No	Volume	Vol+BkGnd	Calib Vol(ug)	Base Pairs	Rf	Band No	Volume	Vol+BkGnd	Calib Vol(ug)	Base Pairs	Rf	Band No	Volume	Vol+BkGnd	Calib Vol(ug)	Base Pairs	Rf	Band No	Volume	Vol+BkGnd	Calib Vol(ug)	Base Pairs	Rf	Band No	Volume
1	1789750	1789750	-	815.65	0.492	1	1928857	1928857	-	815.65	0.492	1	1441459	1441459	-	734.122	0.514	1	1076447	1076447	-	610.147	0.549	1	2779687	2779687	-	423.592	0.613	1	799344	799344	-	796.094	0.497	1	704831	704831	-	891.712	0.473	1	931712	931712	-	819.572	0.491	1	583759
2	2082022	2082022	-	590.012	0.555	2	2154472	2154472	-	497.051	0.587	2	630955	630955	-	590.012	0.555	2	1040379	1040379	-	420.916	0.615							2	899268	899268	-	603.365	0.551	2	965813	965813	-	616.998	0.547	2	1078973	1078973	-	606.747	0.55	2	563942
												3	1065717	1065717	-	437.158	0.608													3	856002	856002	-	434.42	0.609	3	1125648	1125648	-	428.981	0.611	3	1121847	1121847	-	437.158	0.608	3	522086
																																																4	592475
																																																5	750848
																																																6	296916
																																																7	417270
																																																8	480538
																																																9	389656
																																																10	735622
																																																11	443340
																																																12	630191
																																																13	721983
																																																14	626820
																																																15	241398
Lane 1	Lane 1	Lane 1	Lane 1	Lane 1	Lane 1	Lane 2	Lane 2	Lane 2	Lane 2	Lane 2	Lane 2	Lane 3	Lane 3	Lane 3	Lane 3	Lane 3	Lane 3	Lane 4	Lane 4	Lane 4	Lane 4	Lane 4	Lane 4	Lane 5	Lane 5	Lane 5	Lane 5	Lane 5	Lane 5	Lane 6	Lane 6	Lane 6	Lane 6	Lane 6	Lane 6	Lane 7	Lane 7	Lane 7	Lane 7	Lane 7	Lane 7	Lane 8	Lane 8	Lane 8	Lane 8	Lane 8	Lane 8	Lane 9	Lane 9
Band No	Volume	Vol+BkGnd	Calib Vol(ug)	Base Pairs	Rf	Band No	Volume	Vol+BkGnd	Calib Vol(ug)	Base Pairs	Rf	Band No	Volume	Vol+BkGnd	Calib Vol(ug)	Base Pairs	Rf	Band No	Volume	Vol+BkGnd	Calib Vol(ug)	Base Pairs	Rf	Band No	Volume	Vol+BkGnd	Calib Vol(ug)	Base Pairs	Rf	Band No	Volume	Vol+BkGnd	Calib Vol(ug)	Base Pairs	Rf	Band No	Volume	Vol+BkGnd	Calib Vol(ug)	Base Pairs	Rf	Band No	Volume	Vol+BkGnd	Calib Vol(ug)	Base Pairs	Rf	Band No	Volume
1	6126873	6126873	-	596.848	0.628	1	65135	65135	-	600	0.627	1	99844	99844	-	600	0.627	1	59982	59982	-	408.122	0.704	1	366568	366568	-	622.31	0.62	1	85307	85307	-	474.08	0.673	1	67672	67672	-	492.039	0.666	1	105373	105373	-	1048.19	0.488	1	23577
2	4143362	4143362	-	438.346	0.689	2	811112	811112	-	456.951	0.681	2	4225274	4225274	-	422.875	0.697							2	3667980	3667980	-	474.08	0.673													2	1609942	1609942	-	803.369	0.561	2	1111675
																																										3	234199	234199	-	442.902	0.687	3	825101
																																																4	1029793
																																																5	18063
																																																6	210232
																																																7	582709
																																																8	29159
																																																9	631211
																																																10	20264
																																																11	875833
																																																12	153732
																																																13	496264
																																																14	753663
Lane 1	Lane 1	Lane 1	Lane 1	Lane 1	Lane 1	Lane 2	Lane 2	Lane 2	Lane 2	Lane 2	Lane 2	Lane 3	Lane 3	Lane 3	Lane 3	Lane 3	Lane 3	Lane 4	Lane 4	Lane 4	Lane 4	Lane 4	Lane 4	Lane 5	Lane 5	Lane 5	Lane 5	Lane 5	Lane 5	Lane 6	Lane 6	Lane 6	Lane 6	Lane 6	Lane 6	Lane 7	Lane 7	Lane 7	Lane 7	Lane 7	Lane 7	Lane 8	Lane 8	Lane 8	Lane 8	Lane 8	Lane 8	Lane 9	Lane 9
Band No	Volume	Vol+BkGnd	Calib Vol(ug)	Base Pairs	Rf	Band No	Volume	Vol+BkGnd	Calib Vol(ug)	Base Pairs	Rf	Band No	Volume	Vol+BkGnd	Calib Vol(ug)	Base Pairs	Rf	Band No	Volume	Vol+BkGnd	Calib Vol(ug)	Base Pairs	Rf	Band No	Volume	Vol+BkGnd	Calib Vol(ug)	Base Pairs	Rf	Band No	Volume	Vol+BkGnd	Calib Vol(ug)	Base Pairs	Rf	Band No	Volume	Vol+BkGnd	Calib Vol(ug)	Base Pairs	Rf	Band No	Volume	Vol+BkGnd	Calib Vol(ug)	Base Pairs	Rf	Band No	Volume
1	1628608	1628608	-	1298.68	0.445	1	24465	24465	-	925.957	0.524	1	43745	43745	-	690.003	0.592	1	860337	860337	-	706.561	0.587	1	1281607	1281607	-	1215.5	0.461	1	2211257	2211257	-	1043.18	0.492	1	163039	163039	-	519.857	0.646	1	511120	511120	-	760.626	0.571	1	29319
2	53305	53305	-	877.369	0.539	2	9126923	9126923	-	706.561	0.587							2	115840	115840	-	522.33	0.645	2	954832	954832	-	877.369	0.539	2	37670	37670	-	652.507	0.602							2	667418	667418	-	632.19	0.608	2	1856447
3	198850	198850	-	652.507	0.602																			3	62996	62996	-	652.507	0.602	3	1000374	1000374	-	466.967	0.665							3	53571	53571	-	479.73	0.661	3	2396903
4	7812669	7812669	-	466.967	0.665																			4	7624639	7624639	-	522.33	0.645																			4	654780
																																																5	71293
																																																6	779147
																																																7	511965
																																																8	45205
																																																9	1041518
																																																10	24196
																																																11	695922
																																																12	1020750
																																																13	916832
																																																14	4516629
Lane 4	Lane 4	Lane 4	Lane 4	Lane 4	Lane 4	Lane 9	Lane 9	Lane 9	Lane 9	Lane 9	Lane 9
Band No	Volume	Vol+BkGnd	Calib Vol(ug)	Base Pairs	Rf	Band No	Volume	Vol+BkGnd	Calib Vol(ug)	Base Pairs	Rf
						1	390891	390891	-	3000	0.102
						2	393116	393116	-	2000	0.212
						3	444655	444655	-	1500	0.301
						4	354846	354846	-	1200	0.364
						5	674063	674063	-	1000	0.41
						6	265600	265600	-	900	0.443
						7	324257	324257	-	800	0.474
						8	366450	366450	-	700	0.504
						9	332127	332127	-	600	0.54
						10	650463	650463	-	500	0.582
						11	501981	501981	-	400	0.629
						12	622759	622759	-	300	0.683
						13	679740	679740	-	200	0.738
						14	516682	516682	-	100	0.797
Lane 1	Lane 1	Lane 1	Lane 1	Lane 1	Lane 1	Lane 2	Lane 2	Lane 2	Lane 2	Lane 2	Lane 2	Lane 6	Lane 6	Lane 6	Lane 6	Lane 6	Lane 6	Lane 7	Lane 7	Lane 7	Lane 7	Lane 7	Lane 7	Lane 9	Lane 9	Lane 9	Lane 9	Lane 9	Lane 9	Lane 10	Lane 10	Lane 10	Lane 10	Lane 10	Lane 10
Band No	Volume	Vol+BkGnd	Calib Vol(ug)	Base Pairs	Rf	Band No	Volume	Vol+BkGnd	Calib Vol(ug)	Base Pairs	Rf	Band No	Volume	Vol+BkGnd	Calib Vol(ug)	Base Pairs	Rf	Band No	Volume	Vol+BkGnd	Calib Vol(ug)	Base Pairs	Rf	Band No	Volume	Vol+BkGnd	Calib Vol(ug)	Base Pairs	Rf	Band No	Volume	Vol+BkGnd	Calib Vol(ug)	Base Pairs	Rf
1	22932	22932	-	424.713	0.618	1	5236910	5236910	-	424.713	0.618	1	5771220	5771220	-	444.147	0.61	1	5932075	5932075	-	466.945	0.6	1	34540	34540	-	3000	0.151	1	5766332	5766332	-	446.955	0.609
2	444716	444716	-	328.899	0.66																			2	1369333	1369333	-	2000	0.253
																								3	962593	962593	-	1500	0.332
																								4	1140184	1140184	-	1200	0.39
																								5	14893	14893	-	1000	0.438
																								6	486908	486908	-	900	0.463
																								7	323438	323438	-	800	0.495
																								8	314047	314047	-	700	0.523
																								9	329107	329107	-	600	0.553
																								10	24535	24535	-	500	0.587
																								11	424905	424905	-	400	0.629
																								12	525267	525267	-	300	0.673
																								13	563213	563213	-	200	0.723
																								14	3933589	3933589	-	100	0.776
[truncated: 46 more columns]

## Sheet: 834
Lane 1	Lane 1	Lane 1	Lane 1	Lane 1	Lane 1	Lane 2	Lane 2	Lane 2	Lane 2	Lane 2	Lane 2	Lane 3	Lane 3	Lane 3	Lane 3	Lane 3	Lane 3	Lane 4	Lane 4	Lane 4	Lane 4	Lane 4	Lane 4	Lane 5	Lane 5	Lane 5	Lane 5	Lane 5	Lane 5	Lane 6	Lane 6	Lane 6	Lane 6	Lane 6	Lane 6	Lane 7	Lane 7	Lane 7	Lane 7	Lane 7	Lane 7	Lane 8	Lane 8	Lane 8	Lane 8	Lane 8	Lane 8	Lane 9	Lane 9
Band No	Volume	Vol+BkGnd	Calib Vol(ug)	Base Pairs	Rf	Band No	Volume	Vol+BkGnd	Calib Vol(ug)	Base Pairs	Rf	Band No	Volume	Vol+BkGnd	Calib Vol(ug)	Base Pairs	Rf	Band No	Volume	Vol+BkGnd	Calib Vol(ug)	Base Pairs	Rf	Band No	Volume	Vol+BkGnd	Calib Vol(ug)	Base Pairs	Rf	Band No	Volume	Vol+BkGnd	Calib Vol(ug)	Base Pairs	Rf	Band No	Volume	Vol+BkGnd	Calib Vol(ug)	Base Pairs	Rf	Band No	Volume	Vol+BkGnd	Calib Vol(ug)	Base Pairs	Rf	Band No	Volume
1	26882	26882	-	876.708	0.546	1	5562353	5562353	-	494.651	0.653	1	75632	75632	-	1348.94	0.445	1	1598585	1598585	-	876.708	0.546	1	78813	78813	-	849.138	0.552	1	53604	53604	-	769.531	0.574	1	2070053	2070053	-	1348.94	0.445	1	77093	77093	-	1015.56	0.509	1	25516
2	530103	530103	-	696.376	0.595							2	2437009	2437009	-	933.533	0.531	2	5375475	5375475	-	459.231	0.667	2	1721588	1721588	-	459.231	0.667	2	856298	856298	-	536.882	0.639	2	846278	846278	-	822.067	0.559	2	1426120	1426120	-	822.067	0.559	2	2886546
3	2524580	2524580	-	449.734	0.671							3	74173	74173	-	669.907	0.602							3	5424673	5424673	-	263.928	0.76	3	2442292	2442292	-	213.032	0.782	3	664282	664282	-	611.242	0.617	3	756198	756198	-	638.446	0.61	3	841663
4	3701021	3701021	-	213.032	0.782							4	1273376	1273376	-	476.507	0.66																			4	76986	76986	-	440.5	0.675	4	183119	183119	-	440.5	0.675	4	540726
												5	4103679	4103679	-	295.686	0.746																			5	1679176	1679176	-	213.032	0.782	5	5546044	5546044	-	195.807	0.789	5	14677
																																																6	565952
																																																7	382855
																																																8	35872
																																																9	725119
																																																10	46952
																																																11	508607
																																																12	754958
																																																13	674411
																																																14	3648233
Lane 1	Lane 1	Lane 1	Lane 1	Lane 1	Lane 1	Lane 2	Lane 2	Lane 2	Lane 2	Lane 2	Lane 2	Lane 3	Lane 3	Lane 3	Lane 3	Lane 3	Lane 3	Lane 4	Lane 4	Lane 4	Lane 4	Lane 4	Lane 4	Lane 5	Lane 5	Lane 5	Lane 5	Lane 5	Lane 5	Lane 6	Lane 6	Lane 6	Lane 6	Lane 6	Lane 6
Band No	Volume	Vol+BkGnd	Calib Vol(ug)	Base Pairs	Rf	Band No	Volume	Vol+BkGnd	Calib Vol(ug)	Base Pairs	Rf	Band No	Volume	Vol+BkGnd	Calib Vol(ug)	Base Pairs	Rf	Band No	Volume	Vol+BkGnd	Calib Vol(ug)	Base Pairs	Rf	Band No	Volume	Vol+BkGnd	Calib Vol(ug)	Base Pairs	Rf	Band No	Volume	Vol+BkGnd	Calib Vol(ug)	Base Pairs	Rf
1	503048	503048	-	740.309	0.438	1	656221	656221	-	473.917	0.526													1	346273	346273	-	795.508	0.421	1	1700299	1700299	-	210.294	0.644
2	821461	821461	-	509.601	0.513	2	636918	636918	-	215.33	0.642													2	2209740	2209740	-	251.36	0.624
3	861347	861347	-	230.06	0.635
[truncated: 52 more columns]

## Sheet: 842
Lane 1	Lane 1	Lane 1	Lane 1	Lane 1	Lane 1	Lane 2	Lane 2	Lane 2	Lane 2	Lane 2	Lane 2	Lane 3	Lane 3	Lane 3	Lane 3	Lane 3	Lane 3	Lane 4	Lane 4	Lane 4	Lane 4	Lane 4	Lane 4	Lane 5	Lane 5	Lane 5	Lane 5	Lane 5	Lane 5	Lane 6	Lane 6	Lane 6	Lane 6	Lane 6	Lane 6	Lane 7	Lane 7	Lane 7	Lane 7	Lane 7	Lane 7	Lane 8	Lane 8	Lane 8	Lane 8	Lane 8	Lane 8	Lane 9	Lane 9
Band No	Volume	Vol+BkGnd	Calib Vol(ug)	Base Pairs	Rf	Band No	Volume	Vol+BkGnd	Calib Vol(ug)	Base Pairs	Rf	Band No	Volume	Vol+BkGnd	Calib Vol(ug)	Base Pairs	Rf	Band No	Volume	Vol+BkGnd	Calib Vol(ug)	Base Pairs	Rf	Band No	Volume	Vol+BkGnd	Calib Vol(ug)	Base Pairs	Rf	Band No	Volume	Vol+BkGnd	Calib Vol(ug)	Base Pairs	Rf	Band No	Volume	Vol+BkGnd	Calib Vol(ug)	Base Pairs	Rf	Band No	Volume	Vol+BkGnd	Calib Vol(ug)	Base Pairs	Rf	Band No	Volume
1	679550	679550	-	239.851	0.772	1	2902718	2902718	-	515.214	0.648	1	2945581	2945581	-	568.561	0.625	1	306275	306275	-	373.088	0.713	1	98905	98905	-	274.129	0.756	1	393190	393190	-	290.515	0.749	1	1137591	1137591	-	466.377	0.671	1	4728791	4728791	-	239.851	0.772	1	90853
2	215191	215191	-	159.097	0.811	2	4197666	4197666	-	206.557	0.788	2	151183	151183	-	274.129	0.756													2	3991232	3991232	-	176.202	0.803	2	78014	78014	-	307.173	0.741							2	3487600
												3	551045	551045	-	176.202	0.803																			3	4726190	4726190	-	144.236	0.819							3	1092841
																																																4	729760
																																																5	49758
																																																6	414850
																																																7	420683
																																																8	530295
																																																9	1128717
																																																10	28913
																																																11	1624300
																																																12	40160
																																																13	951078
																																																14	908244
Lane 1	Lane 1	Lane 1	Lane 1	Lane 1	Lane 1	Lane 2	Lane 2	Lane 2	Lane 2	Lane 2	Lane 2	Lane 3	Lane 3	Lane 3	Lane 3	Lane 3	Lane 3	Lane 4	Lane 4	Lane 4	Lane 4	Lane 4	Lane 4	Lane 5	Lane 5	Lane 5	Lane 5	Lane 5	Lane 5	Lane 6	Lane 6	Lane 6	Lane 6	Lane 6	Lane 6	Lane 7	Lane 7	Lane 7	Lane 7	Lane 7	Lane 7	Lane 8	Lane 8	Lane 8	Lane 8	Lane 8	Lane 8	Lane 9	Lane 9
Band No	Volume	Vol+BkGnd	Calib Vol(ug)	Base Pairs	Rf	Band No	Volume	Vol+BkGnd	Calib Vol(ug)	Base Pairs	Rf	Band No	Volume	Vol+BkGnd	Calib Vol(ug)	Base Pairs	Rf	Band No	Volume	Vol+BkGnd	Calib Vol(ug)	Base Pairs	Rf	Band No	Volume	Vol+BkGnd	Calib Vol(ug)	Base Pairs	Rf	Band No	Volume	Vol+BkGnd	Calib Vol(ug)	Base Pairs	Rf	Band No	Volume	Vol+BkGnd	Calib Vol(ug)	Base Pairs	Rf	Band No	Volume	Vol+BkGnd	Calib Vol(ug)	Base Pairs	Rf	Band No	Volume
1	43677	43677	-	312.533	0.703	1	1036765	1036765	-	766.005	0.544	1	603804	603804	-	444.628	0.641	1	1848390	1848390	-	938.54	0.497	1	169637	169637	-	612.255	0.586	1	69882	69882	-	368.944	0.675	1	735051	735051	-	707.423	0.558	1	774313	774313	-	500	0.62	1	29866
						2	636205	636205	-	481.165	0.627	2	798635	798635	-	328.599	0.695	2	799724	799724	-	412.16	0.655	2	4556108	4556108	-	328.599	0.695	2	4628487	4628487	-	157.884	0.771	2	742962	742962	-	461.087	0.634	2	31879	31879	-	328.599	0.695	2	2339775
						3	459507	459507	-	342.226	0.688	3	3183069	3183069	-	132.257	0.785	3	4023672	4023672	-	282.552	0.716													3	71083	71083	-	342.226	0.688	3	4524412	4524412	-	200	0.75	3	746714
						4	3394067	3394067	-	200	0.75																									4	3951190	3951190	-	145.694	0.777							4	493389
																																																5	10174
																																																6	225148
																																																7	591155
																																																8	18762
																																																9	659853
																																																10	40163
																																																11	470430
																																																12	666665
																																																13	668270
																																																14	3834443
Lane 1	Lane 1	Lane 1	Lane 1	Lane 1	Lane 1	Lane 2	Lane 2	Lane 2	Lane 2	Lane 2	Lane 2	Lane 3	Lane 3	Lane 3	Lane 3	Lane 3	Lane 3	Lane 4	Lane 4	Lane 4	Lane 4	Lane 4	Lane 4	Lane 5	Lane 5	Lane 5	Lane 5	Lane 5	Lane 5	Lane 6	Lane 6	Lane 6	Lane 6	Lane 6	Lane 6	Lane 7	Lane 7	Lane 7	Lane 7	Lane 7	Lane 7	Lane 9	Lane 9	Lane 9	Lane 9	Lane 9	Lane 9	Lane 10	Lane 10
Band No	Volume	Vol+BkGnd	Calib Vol(ug)	Base Pairs	Rf	Band No	Volume	Vol+BkGnd	Calib Vol(ug)	Base Pairs	Rf	Band No	Volume	Vol+BkGnd	Calib Vol(ug)	Base Pairs	Rf	Band No	Volume	Vol+BkGnd	Calib Vol(ug)	Base Pairs	Rf	Band No	Volume	Vol+BkGnd	Calib Vol(ug)	Base Pairs	Rf	Band No	Volume	Vol+BkGnd	Calib Vol(ug)	Base Pairs	Rf	Band No	Volume	Vol+BkGnd	Calib Vol(ug)	Base Pairs	Rf	Band No	Volume	Vol+BkGnd	Calib Vol(ug)	Base Pairs	Rf	Band No	Volume
1	2129242	2129242	-	1059.42	0.406	1	8400964	8400964	-	277.58	0.672	1	3251070	3251070	-	263.128	0.68	1	7044061	7044061	-	230.117	0.696	1	4201185	4201185	-	223.998	0.699	1	2363385	2363385	-	813.557	0.467	1	2751317	2751317	-	741.948	0.49	1	737466	737466	-	3000	0.128
2	895311	895311	-	669.605	0.512																									2	1559854	1559854	-	352.012	0.634	2	1460213	1460213	-	375.153	0.623	2	626658	626658	-	2000	0.235
3	974594	974594	-	502.584	0.571																															3	2828764	2828764	-	223.998	0.699	3	707268	707268	-	1500	0.312
4	2972235	2972235	-	345.903	0.638																																					4	802980	802980	-	1200	0.372
																																										5	952681	952681	-	1000	0.42
																																										6	443726	443726	-	900	0.444
																																										7	572391	572391	-	800	0.471
																																										8	614726	614726	-	700	0.503
																																										9	578746	578746	-	600	0.534
																																										10	982442	982442	-	500	0.572
																																										11	790627	790627	-	400	0.612
																																										12	870104	870104	-	300	0.661
																																										13	747089	747089	-	200	0.711
																																										14	3299704	3299704	-	100	0.768
[truncated: 52 more columns]

## Sheet: 846
Lane 4	Lane 4	Lane 4	Lane 4	Lane 4	Lane 4	Lane 6	Lane 6	Lane 6	Lane 6	Lane 6	Lane 6	Lane 8	Lane 8	Lane 8	Lane 8	Lane 8	Lane 8	Lane 9	Lane 9	Lane 9	Lane 9	Lane 9	Lane 9	Lane 10	Lane 10	Lane 10	Lane 10	Lane 10	Lane 10	Lane 11	Lane 11	Lane 11	Lane 11	Lane 11	Lane 11	Lane 13	Lane 13	Lane 13	Lane 13	Lane 13	Lane 13	Lane 14	Lane 14	Lane 14	Lane 14	Lane 14	Lane 14	Lane 15	Lane 15
Band No	Volume	Vol+BkGnd	Calib Vol(ug)	Base Pairs	Rf	Band No	Volume	Vol+BkGnd	Calib Vol(ug)	Base Pairs	Rf	Band No	Volume	Vol+BkGnd	Calib Vol(ug)	Base Pairs	Rf	Band No	Volume	Vol+BkGnd	Calib Vol(ug)	Base Pairs	Rf	Band No	Volume	Vol+BkGnd	Calib Vol(ug)	Base Pairs	Rf	Band No	Volume	Vol+BkGnd	Calib Vol(ug)	Base Pairs	Rf	Band No	Volume	Vol+BkGnd	Calib Vol(ug)	Base Pairs	Rf	Band No	Volume	Vol+BkGnd	Calib Vol(ug)	Base Pairs	Rf	Band No	Volume
																		1	1462172	1462172	-	3000	0.219	1	1291002	1291002	-	836.243	0.54	1	1129786	1129786	-	836.243	0.54							1	1249533	1249533	-	836.243	0.54	1	82770
																		2	1067293	1067293	-	2000	0.32	2	5470575	5470575	-	533.547	0.638	2	53095	53095	-	584.513	0.621							2	5449512	5449512	-	506.531	0.648
																		3	816271	816271	-	1500	0.397
																		4	527188	527188	-	1200	0.456
																		5	18154	18154	-	1000	0.495
																		6	602450	602450	-	900	0.526
																		7	30351	30351	-	800	0.549
																		8	818819	818819	-	700	0.584
																		9	461467	461467	-	600	0.616
																		10	36450	36450	-	500	0.65
																		11	1214502	1214502	-	400	0.692
																		12	779147	779147	-	300	0.741
																		13	33343	33343	-	200	0.796
																		14	3040753	3040753	-	100	0.847
[truncated: 10 more columns]

## Sheet: 848
Lane 1	Lane 1	Lane 1	Lane 1	Lane 1	Lane 1	Lane 3	Lane 3	Lane 3	Lane 3	Lane 3	Lane 3	Lane 4	Lane 4	Lane 4	Lane 4	Lane 4	Lane 4	Lane 9	Lane 9	Lane 9	Lane 9	Lane 9	Lane 9	Lane 10	Lane 10	Lane 10	Lane 10	Lane 10	Lane 10	Lane 11	Lane 11	Lane 11	Lane 11	Lane 11	Lane 11	Lane 12	Lane 12	Lane 12	Lane 12	Lane 12	Lane 12	Lane 14	Lane 14	Lane 14	Lane 14	Lane 14	Lane 14	Lane 15	Lane 15
Band No	Volume	Vol+BkGnd	Calib Vol(ug)	Base Pairs	Rf	Band No	Volume	Vol+BkGnd	Calib Vol(ug)	Base Pairs	Rf	Band No	Volume	Vol+BkGnd	Calib Vol(ug)	Base Pairs	Rf	Band No	Volume	Vol+BkGnd	Calib Vol(ug)	Base Pairs	Rf	Band No	Volume	Vol+BkGnd	Calib Vol(ug)	Base Pairs	Rf	Band No	Volume	Vol+BkGnd	Calib Vol(ug)	Base Pairs	Rf	Band No	Volume	Vol+BkGnd	Calib Vol(ug)	Base Pairs	Rf	Band No	Volume	Vol+BkGnd	Calib Vol(ug)	Base Pairs	Rf	Band No	Volume
1	18995053	18995053	-	353.732	0.681													1	24074	24074	-	3000	0.222	1	727139	727139	-	910.301	0.5	1	1744195	1744195	-	737.519	0.547	1	1562320	1562320	-	831.431	0.527	1	14012066	14012066	-	831.431	0.527	1	1393670
																		2	1608283	1608283	-	2000	0.312	2	1100227	1100227	-	831.431	0.527	2	8009674	8009674	-	457.81	0.635	2	7525345	7525345	-	457.81	0.635							2	12854808
																		3	2039499	2039499	-	1500	0.38	3	122364	122364	-	622.389	0.581
																		4	587561	587561	-	1200	0.439	4	10248953	10248953	-	425.631	0.648
																		5	12935	12935	-	1000	0.481
																		6	643026	643026	-	900	0.503
																		7	366242	366242	-	800	0.535
																		8	63889	63889	-	700	0.555
																		9	890351	890351	-	600	0.59
																		10	17196	17196	-	500	0.62
																		11	607606	607606	-	400	0.66
																		12	810745	810745	-	300	0.706
																		13	939563	939563	-	200	0.758
																		14	4738476	4738476	-	100	0.81
Lane 1	Lane 1	Lane 1	Lane 1	Lane 1	Lane 1	Lane 2	Lane 2	Lane 2	Lane 2	Lane 2	Lane 2	Lane 3	Lane 3	Lane 3	Lane 3	Lane 3	Lane 3	Lane 4	Lane 4	Lane 4	Lane 4	Lane 4	Lane 4	Lane 5	Lane 5	Lane 5	Lane 5	Lane 5	Lane 5	Lane 6	Lane 6	Lane 6	Lane 6	Lane 6	Lane 6	Lane 7	Lane 7	Lane 7	Lane 7	Lane 7	Lane 7	Lane 8	Lane 8	Lane 8	Lane 8	Lane 8	Lane 8	Lane 9	Lane 9
Band No	Volume	Vol+BkGnd	Calib Vol(ug)	Base Pairs	Rf	Band No	Volume	Vol+BkGnd	Calib Vol(ug)	Base Pairs	Rf	Band No	Volume	Vol+BkGnd	Calib Vol(ug)	Base Pairs	Rf	Band No	Volume	Vol+BkGnd	Calib Vol(ug)	Base Pairs	Rf	Band No	Volume	Vol+BkGnd	Calib Vol(ug)	Base Pairs	Rf	Band No	Volume	Vol+BkGnd	Calib Vol(ug)	Base Pairs	Rf	Band No	Volume	Vol+BkGnd	Calib Vol(ug)	Base Pairs	Rf	Band No	Volume	Vol+BkGnd	Calib Vol(ug)	Base Pairs	Rf	Band No	Volume
1	2467855	2467855	-	1723.07	0.351	1	4214518	4214518	-	662.359	0.572	1	4230905	4230905	-	673.822	0.569	1	3294461	3294461	-	685.181	0.566	1	1371759	1371759	-	700	0.563	1	4088472	4088472	-	721.256	0.557	1	3630583	3630583	-	728.111	0.555	1	6749126	6749126	-	417.217	0.656	1	770063
2	873826	873826	-	717.79	0.558	2	1214790	1214790	-	370.349	0.676	2	1600737	1600737	-	374.73	0.674	2	1357934	1357934	-	385.956	0.669	2	1289078	1289078	-	390.564	0.667	2	768475	768475	-	529.716	0.613	2	988652	988652	-	404.833	0.661							2	726722
3	1269249	1269249	-	370.349	0.676																									3	1249370	1249370	-	402.407	0.662													3	709559
																																																4	819849
																																																5	955833
																																																6	445461
																																																7	517350
																																																8	590630
																																																9	529963
																																																10	901595
																																																11	716627
																																																12	788323
																																																13	805643
																																																14	875996
[truncated: 46 more columns]

## Sheet: Arkusz1
Sample No.	Pop.		Locus 1	Locus 2	Locus 3	Locus 4	Locus 5	Locus 6	Locus 7	Locus 8	Locus 9	Locus 10	Locus 11	Locus 12	Locus 13	Locus 14	Locus 15	Locus 16	Locus 17	Locus 18	Locus 19	Locus 20	Locus 21	Locus 22	Locus 23	Locus 24	Locus 25	Locus 26	Locus 27	Locus 28	Locus 29	Locus 30	Locus 31	Locus 32	Locus 33	Locus 34	Locus 35	Locus 36	Locus 37	Locus 38	Locus 39	Locus 40	Locus 41	Locus 42	Locus 43	Locus 44	Locus 45	Locus 46	Locus 47
P1.1_S	Pop 1	1	0	0	0	0	0	1	0	0	0	1	0	0	0	0	0	0	0	0	0	0	1	0	0	1	1	1	0	0	0	0	0	0	0	0	0	1	0	0	1	0	0	0	0	0	0	0	0
P1.2_S	Pop 1	1	0	0	0	0	0	1	0	0	0	1	0	0	0	0	0	0	0	0	0	0	1	0	0	1	1	1	0	0	0	0	0	0	0	0	0	1	0	0	1	0	0	0	0	0	0	0	0
P1.3_S	Pop 1	1	0	0	0	0	0	1	0	0	0	1	0	0	0	0	0	0	0	0	0	0	1	0	0	1	1	1	0	0	0	0	0	0	1	0	0	1	0	0	1	0	0	0	0	0	0	0	0
P1.4_S	Pop 1	1	0	0	0	0	0	1	0	1	0	1	0	0	0	0	0	0	0	0	0	0	1	0	0	1	1	1	0	0	0	0	0	0	0	0	0	1	0	0	1	0	0	0	0	0	0	0	0
P1.5_S	Pop 1	1	0	0	0	0	0	1	0	1	0	1	0	0	0	0	0	0	0	0	0	0	1	0	0	1	0	0	0	0	0	0	0	0	0	0	0	1	0	0	1	0	0	0	0	0	0	0	0
P1.6_S	Pop 1	1	0	0	0	0	0	1	0	1	0	1	0	0	0	0	0	0	0	0	0	0	1	0	0	1	0	1	0	0	0	0	0	0	0	0	0	1	0	0	1	0	0	0	0	0	0	0	0
P1.7_S	Pop 1	1	0	0	0	0	0	1	0	0	0	1	0	0	0	0	0	0	0	0	0	0	1	0	0	1	0	1	0	0	0	0	0	0	0	0	0	1	0	0	1	0	0	0	0	0	0	0	0
P1.8_S	Pop 1	1	0	0	0	0	0	1	0	0	0	1	0	0	0	0	0	0	0	0	0	0	1	0	1	1	0	1	0	0	0	0	0	0	0	0	1	1	1	0	1	0	0	0	0	0	0	0	0
P2.1_S	Pop 2	2	0	0	0	0	0	0	0	0	0	1	0	0	0	0	0	0	0	0	0	0	1	0	1	1	1	1	0	0	0	0	0	0	0	0	0	0	1	0	0	0	0	0	0	0	0	0	0
P2.2_S	Pop 2	2	0	0	0	0	0	1	0	0	0	1	0	0	0	0	0	0	0	0	0	0	0	0	1	1	1	1	0	0	0	0	0	0	0	0	0	0	1	0	0	0	0	0	0	0	0	0	0
P2.3_S	Pop 2	2	0	0	0	0	0	1	0	0	0	1	0	0	0	0	0	0	0	0	0	0	0	0	1	1	1	1	0	0	0	0	0	0	0	0	0	0	1	0	0	0	0	0	0	0	0	0	0
P2.4_S	Pop 2	2	0	0	0	0	0	1	0	0	1	0	0	1	0	0	0	0	0	0	0	0	0	0	1	1	1	1	0	0	0	0	0	0	0	0	0	0	1	0	0	0	0	0	0	0	0	0	0
P2.5_S	Pop 2	2	0	0	0	0	0	1	0	0	0	1	0	0	0	0	0	0	0	0	0	0	0	0	1	1	1	1	0	0	0	0	0	0	0	0	0	1	1	0	0	0	0	0	0	0	0	0	0
P2.6_S	Pop 2	2	0	0	0	0	0	1	0	0	0	1	0	0	0	0	0	0	0	0	0	0	0	0	1	1	1	1	0	0	0	0	0	0	0	0	0	0	1	0	0	0	0	0	0	0	0	0	0
P2.7_S	Pop 2	2	0	0	0	0	0	0	0	0	0	1	0	0	0	0	0	0	0	0	0	0	0	0	1	1	1	1	0	0	0	0	0	0	0	0	0	0	1	0	0	1	0	0	0	0	0	0	0
P2.8_S	Pop 2	2	0	0	0	0	0	1	0	0	0	1	0	0	0	0	0	0	0	0	0	0	0	1	1	1	1	1	0	0	0	0	0	0	0	0	0	1	1	0	0	1	0	0	0	0	0	0	0
P3.1_N	Pop 3	3	0	0	0	0	0	0	0	0	0	1	0	0	0	0	0	0	0	0	0	0	1	1	1	1	0	1	0	0	0	0	0	0	0	1	0	1	1	0	0	0	0	0	0	0	0	0	0
P3.2_N	Pop 3	3	0	0	0	0	0	0	0	0	0	1	0	0	0	0	0	0	0	0	0	0	1	0	1	1	1	1	0	0	0	0	0	0	0	1	0	1	1	0	0	0	0	0	0	0	0	0	0
P3.3_N	Pop 3	3	0	0	0	0	0	0	0	0	0	1	0	0	0	0	0	0	0	0	0	0	1	0	1	1	1	1	0	0	0	0	0	0	0	1	0	1	1	0	1	0	0	0	0	0	0	0	0
P3.4_N	Pop 3	3	0	0	0	0	0	0	0	0	0	1	0	0	1	0	0	0	0	0	0	0	0	1	0	1	1	0	1	0	0	0	0	0	0	1	0	1	1	0	1	0	0	0	0	0	0	0	0
P3.5_N	Pop 3	3	0	0	0	0	0	0	0	0	0	1	0	0	0	0	0	0	0	0	0	0	1	0	1	1	1	1	0	0	0	0	0	0	0	0	0	1	1	0	0	0	0	0	0	0	0	0	0
P3.6_N	Pop 3	3	0	0	0	0	0	0	0	0	0	1	0	0	0	0	0	0	0	0	0	0	1	0	1	1	0	1	0	0	0	0	0	0	0	0	0	1	1	0	0	0	0	0	0	0	0	0	0
P3.7_N	Pop 3	3	0	0	0	0	0	0	0	0	0	1	0	0	0	0	0	0	0	0	0	0	1	1	1	1	0	1	0	0	0	0	0	0	0	0	0	1	1	0	0	0	0	0	0	0	0	0	0
P3.8_N	Pop 3	3	0	0	0	0	0	0	0	0	0	1	0	0	0	0	0	0	0	0	0	0	1	1	1	1	0	1	0	0	0	0	0	0	0	0	0	1	1	0	0	0	0	0	0	0	0	0	0
P4.1_N	Pop 4	4	0	0	0	0	0	0	0	0	0	1	0	0	0	0	0	0	0	0	0	0	1	0	0	1	0	1	0	0	0	0	0	0	0	1	0	0	0	0	0	0	0	0	0	0	0	0	0
P4.2_N	Pop 4	4	0	0	0	0	0	0	0	0	0	1	0	0	0	0	0	0	0	0	0	0	1	0	0	1	0	1	0	0	0	0	0	0	0	1	0	0	0	0	0	0	0	0	0	0	0	0	1
P4.3_N	Pop 4	4	0	0	0	0	0	0	0	0	0	1	0	0	0	0	0	0	0	0	0	0	1	0	0	1	0	1	0	0	0	0	0	0	0	1	0	0	0	1	0	0	0	0	0	0	0	0	0
P4.4_N	Pop 4	4	0	0	0	0	0	0	0	0	1	0	1	0	0	0	0	0	0	0	0	0	1	0	0	1	0	0	0	0	0	0	0	0	0	1	0	0	0	0	0	0	0	0	0	0	0	0	0
P4.5_N	Pop 4	4	0	0	0	0	0	0	0	0	0	1	0	0	0	0	0	0	0	0	0	0	1	0	0	1	0	1	0	0	0	0	0	0	0	1	0	0	0	0	0	0	0	0	0	0	0	0	0
P4.6_N	Pop 4	4	0	0	0	0	0	1	0	0	0	0	1	0	0	0	0	0	0	0	0	0	1	0	0	1	0	1	0	0	0	0	0	0	0	1	0	0	0	0	0	0	0	0	0	0	0	0	0
P4.7_N	Pop 4	4	0	0	0	0	0	0	0	0	0	1	0	0	0	0	0	0	0	0	0	0	1	0	0	1	0	1	0	0	0	0	0	1	0	1	0	0	0	0	0	0	0	0	0	0	0	0	0
P4.8_N	Pop 4	4	0	0	0	0	0	0	0	0	0	1	0	0	0	0	0	0	0	0	0	0	1	0	0	1	0	1	0	0	0	0	0	1	0	1	0	0	0	0	0	0	0	0	0	0	0	0	0
P5.1_S	Pop 5	5	0	0	0	0	0	0	0	0	0	0	0	0	0	0	0	0	0	0	0	0	0	0	0	1	0	0	0	0	0	0	0	0	0	0	1	0	0	0	1	0	0	0	0	0	0	0	0
P5.2_S	Pop 5	5	0	0	0	0	0	0	0	0	0	0	0	0	0	0	0	0	0	0	0	0	0	0	0	1	0	0	0	0	0	0	0	0	0	1	0	0	0	1	0	0	0	0	0	0	0	0	0
P5.3_S	Pop 5	5	0	0	0	0	0	0	0	0	0	0	0	0	0	0	0	0	0	0	0	0	0	0	0	1	0	0	0	0	0	0	0	0	0	0	0	0	0	0	0	0	0	0	0	0	0	0	0
P5.4_S	Pop 5	5	0	0	0	0	0	0	0	0	0	0	0	0	0	0	0	0	0	0	0	0	0	0	0	1	0	0	0	0	0	0	0	0	0	0	0	0	0	0	0	0	0	0	0	0	0	0	0
P5.5_S	Pop 5	5	0	0	0	0	0	0	0	0	0	0	0	0	0	0	0	0	0	0	0	0	0	0	0	1	0	0	0	0	0	0	0	0	0	0	0	0	0	0	0	0	0	0	0	0	0	0	0
P5.6_S	Pop 5	5	0	0	0	0	0	0	0	0	0	0	0	0	0	0	0	0	0	0	0	0	0	0	0	1	0	0	0	0	0	0	0	0	0	0	0	0	0	0	0	0	0	0	0	0	0	0	0
P5.7_S	Pop 5	5	0	0	0	0	0	0	0	0	0	0	0	0	0	0	0	0	0	0	0	0	0	0	0	1	0	0	0	0	0	0	0	0	0	0	0	0	1	0	0	0	0	0	0	0	0	0	0
P5.8_S	Pop 5	5	0	0	0	0	0	0	0	0	0	0	0	0	0	0	0	0	0	0	0	0	0	0	0	1	0	0	0	0	0	0	0	0	0	0	0	0	0	0	0	0	0	0	0	0	0	0	1
P6.1_S	Pop 6	6	0	0	0	0	0	1	0	0	0	1	0	0	0	0	0	0	0	0	0	0	0	1	1	0	1	1	0	0	0	0	0	0	1	0	1	0	1	0	1	0	0	0	0	0	0	0	0
P6.2_S	Pop 6	6	0	0	0	0	0	1	0	0	0	1	0	0	0	0	0	0	0	0	0	0	0	1	1	0	1	1	0	0	0	0	0	1	0	1	0	1	1	1	0	0	0	0	0	0	0	0	0
P6.3_S	Pop 6	6	0	0	0	0	0	1	0	0	0	1	0	0	0	0	0	0	0	0	0	0	0	1	1	0	1	1	0	0	0	0	0	0	1	0	0	0	1	0	1	0	0	0	0	0	0	0	0
P6.4_S	Pop 6	6	0	0	0	0	0	1	0	0	0	1	0	0	0	0	0	0	0	0	0	0	0	1	1	0	1	1	0	0	0	0	0	0	1	0	0	0	1	0	1	0	0	0	0	0	0	0	0
P6.5_S	Pop 6	6	0	0	0	0	0	1	0	0	0	1	0	0	0	0	0	0	0	0	0	0	0	1	1	0	1	1	0	0	0	0	0	0	1	0	1	0	1	0	1	0	0	0	0	0	0	0	1
P6.6_S	Pop 6	6	0	0	0	0	0	1	0	0	0	1	0	0	0	0	0	0	0	0	0	0	0	1	1	0	1	1	0	0	0	0	0	0	1	0	0	0	1	0	1	0	0	0	0	0	0	0	0
P6.7_S	Pop 6	6	0	0	0	0	0	1	0	0	0	1	0	0	0	0	0	0	0	0	0	0	0	1	1	0	1	1	0	0	0	0	0	0	1	0	0	0	1	0	1	0	0	0	0	0	0	0	0
P6.8_S	Pop 6	6	0	0	0	0	0	1	0	0	0	1	0	0	0	0	0	0	0	0	0	0	0	1	1	0	1	1	0	0	0	0	0	0	1	0	0	0	1	0	1	0	0	0	0	0	0	0	0
P7.1_S	Pop 7	7	0	0	0	0	0	0	1	0	1	0	0	0	0	0	0	0	0	0	0	0	0	1	0	0	1	0	0	0	0	0	0	0	1	1	0	0	1	0	0	1	0	0	0	0	0	1	0
P7.2_S	Pop 7	7	0	0	0	0	0	0	1	0	1	0	0	0	0	0	0	0	0	0	0	0	0	1	0	0	1	0	0	0	0	0	0	0	1	0	0	0	1	0	0	0	0	0	0	0	0	0	0
P7.3_S	Pop 7	7	0	0	0	0	0	0	0	1	0	0	0	0	0	0	0	0	0	0	0	0	1	0	0	1	0	0	0	0	0	0	0	1	0	0	0	1	0	0	0	0	0	0	0	0	0	0	0
P7.4_S	Pop 7	7	0	0	0	0	0	0	0	0	1	0	0	0	0	0	0	0	0	0	0	0	0	1	0	0	1	0	0	0	0	0	0	0	1	0	1	0	1	0	0	0	0	0	0	0	0	0	0
P7.5_S	Pop 7	7	0	0	0	0	0	0	0	0	1	0	0	0	0	0	0	0	0	0	0	0	0	1	0	0	1	0	0	0	0	0	0	0	1	0	0	0	1	0	0	0	0	0	0	0	0	1	0
P7.6_S	Pop 7	7	0	0	0	0	0	0	0	1	0	0	0	0	0	0	0	0	0	0	0	1	0	1	0	0	1	0	0	0	0	0	0	0	1	0	1	0	1	0	0	0	0	0	0	0	0	0	1
P7.7_S	Pop 7	7	0	0	0	0	0	0	0	0	0	0	0	0	0	0	0	0	0	0	0	0	0	1	0	0	1	0	0	0	0	0	0	0	1	0	0	0	1	0	0	0	1	0	0	0	0	0	0
P7.8_S	Pop 7	7	0	0	0	0	0	0	0	1	0	0	0	0	0	0	0	0	0	0	0	0	0	1	0	0	1	0	0	0	0	0	0	0	1	0	1	0	1	0	0	0	0	0	0	0	0	0	0
P8.1_S	Pop 8	8	0	0	0	0	0	0	0	1	0	0	0	0	0	0	0	0	0	0	0	0	0	1	0	1	0	0	0	0	0	0	0	0	0	0	1	0	1	0	0	0	0	0	0	0	0	0	0
P8.2_S	Pop 8	8	0	0	0	0	0	0	0	1	0	0	0	0	0	0	0	0	0	0	0	0	0	1	0	1	0	0	0	0	0	0	0	0	0	0	1	0	1	0	0	0	0	0	0	0	0	0	0
P8.3_S	Pop 8	8	0	0	0	0	0	0	0	1	0	0	0	0	0	0	0	0	0	0	0	0	0	1	0	0	0	0	0	0	0	0	0	0	0	0	1	0	1	0	0	0	0	0	0	0	0	0	1
P8.4_S	Pop 8	8	0	0	0	0	0	0	0	1	0	0	0	0	0	0	0	0	0	0	0	0	0	1	0	1	0	0	0	0	0	0	0	0	0	0	1	0	1	0	0	0	0	0	0	0	0	0	0
P8.5_S	Pop 8	8	0	0	0	0	0	0	0	1	0	0	0	0	0	0	0	0	0	0	0	0	0	1	0	1	0	0	0	0	0	0	0	0	0	0	1	0	1	0	0	0	0	0	0	0	0	0	0
P8.6_S	Pop 8	8	0	0	0	0	0	0	0	1	0	0	0	0	0	0	0	0	0	0	0	0	0	1	0	1	0	0	0	0	0	0	0	0	0	0	1	0	0	0	0	0	0	0	0	0	0	0	0
P8.7_S	Pop 8	8	0	0	0	0	0	0	0	1	0	0	0	0	0	0	0	0	0	0	0	0	0	1	0	1	0	0	0	0	0	0	0	0	0	0	1	0	1	0	0	0	0	0	0	0	0	0	0
P8.8_S	Pop 8	8	0	0	0	0	0	0	0	1	0	0	0	0	0	0	0	0	0	0	0	0	0	1	0	0	1	0	0	0	0	0	0	0	0	0	1	0	1	0	0	0	0	0	0	0	0	0	0
P9.1_S	Pop 9	9	0	0	0	0	0	0	1	0	0	1	0	0	0	0	0	0	0	0	0	0	0	1	0	0	0	0	0	0	0	0	0	0	1	0	0	1	0	0	0	0	0	0	0	0	0	0	0
P9.2_S	Pop 9	9	0	0	0	0	0	0	1	0	0	1	0	0	0	0	0	0	0	0	0	0	0	1	0	0	0	0	0	0	0	0	0	0	1	0	0	1	0	0	0	0	0	0	0	0	0	0	0
P9.3_S	Pop 9	9	0	1	0	0	0	0	1	0	0	1	0	0	0	0	0	0	0	0	0	0	0	1	0	0	0	0	0	0	0	0	0	1	1	0	0	1	0	0	0	0	0	0	0	0	0	0	0
P9.4_S	Pop 9	9	0	0	0	0	0	0	1	0	0	1	0	0	0	0	0	0	0	0	0	0	0	1	0	0	0	0	0	0	0	0	0	0	1	0	0	1	1	0	0	0	0	0	0	0	0	0	0
P9.5_S	Pop 9	9	0	0	0	0	0	0	1	0	0	1	0	0	0	0	0	0	0	0	0	0	1	1	0	0	0	0	0	0	0	0	0	0	1	0	0	1	0	0	1	0	0	0	0	0	0	0	0
P9.6_S	Pop 9	9	0	0	0	0	0	0	1	0	0	1	0	0	0	0	0	0	0	0	0	0	0	1	1	0	1	0	0	0	0	0	0	0	1	0	0	1	0	0	0	0	0	0	0	0	0	0	0
P9.7_S	Pop 9	9	0	0	0	0	0	0	1	0	0	1	0	0	0	0	0	0	0	0	0	0	0	1	1	0	1	0	0	0	0	0	0	0	1	0	0	1	1	0	0	0	0	0	0	0	0	0	0
P9.8_S	Pop 9	9	0	0	0	0	0	0	1	0	0	1	0	0	0	0	0	0	0	0	0	0	0	1	0	0	1	0	0	0	0	0	0	0	1	0	0	1	1	0	0	0	0	0	0	0	0	0	0
P10.1_N	Pop 10	10	0	1	0	0	0	1	0	0	0	1	0	0	0	0	0	0	0	0	0	0	0	1	1	0	0	0	0	0	0	0	0	0	1	0	1	0	1	0	1	0	0	0	0	0	0	0	0
P10.2_N	Pop 10	10	0	1	0	0	0	1	0	0	0	1	0	0	0	0	0	0	0	0	0	0	0	1	1	0	0	0	0	0	0	0	0	0	1	0	1	0	1	0	0	1	0	0	0	0	0	0	0
P10.3_N	Pop 10	10	1	0	0	0	0	1	0	0	0	1	0	0	0	0	0	0	0	0	0	0	0	1	1	0	0	0	0	0	0	0	0	0	1	0	1	0	1	0	0	1	0	0	0	0	0	0	0
P10.4_N	Pop 10	10	0	1	0	0	0	1	0	0	0	1	0	0	0	0	0	0	0	0	0	0	0	1	1	0	0	0	0	0	0	0	0	0	1	0	1	0	1	0	0	1	0	0	0	0	0	0	0
P10.5_N	Pop 10	10	0	0	0	0	0	1	0	0	0	1	0	0	0	0	0	0	0	0	0	0	0	1	1	0	0	0	0	0	0	0	0	0	1	0	1	0	1	0	1	0	0	0	0	0	0	0	0
P10.6_N	Pop 10	10	0	1	0	0	0	1	0	0	0	1	0	0	0	0	0	0	0	0	0	0	0	1	1	0	0	0	0	0	0	0	0	0	1	0	1	0	1	0	0	1	0	0	0	0	0	0	0
P10.7_N	Pop 10	10	0	0	0	0	0	0	0	0	0	1	0	0	0	0	0	0	0	0	0	0	0	1	0	0	0	0	0	0	0	0	0	0	1	0	1	0	0	0	0	0	0	0	0	0	0	0	0
P10.8_N	Pop 10	10	0	1	0	0	0	1	0	0	0	1	0	0	0	0	0	0	0	0	0	0	0	1	1	0	0	0	0	0	0	0	0	0	1	0	1	0	1	0	0	1	0	0	0	0	0	0	0
P11.1_N	Pop 11	11	0	1	0	0	0	0	0	0	0	1	0	0	0	1	0	0	0	0	0	0	0	1	0	1	1	0	1	0	0	0	0	0	1	0	0	1	1	0	0	0	0	0	0	0	0	0	0
P11.2_N	Pop 11	11	0	0	0	0	0	0	1	0	0	1	0	0	0	0	0	0	0	0	0	0	0	1	0	1	1	0	1	0	0	0	0	0	1	0	0	1	1	0	0	0	0	0	0	0	0	0	0
P11.3_N	Pop 11	11	0	0	0	0	0	0	0	1	0	1	0	0	0	0	0	0	0	0	0	0	0	1	0	1	1	0	1	0	0	0	0	0	1	0	0	1	1	0	0	0	0	0	0	0	0	0	0
P11.4_N	Pop 11	11	0	0	0	0	0	0	0	1	0	1	0	0	0	0	0	0	0	0	0	0	0	1	0	1	1	0	0	0	0	0	0	0	1	0	0	1	1	0	0	0	0	0	0	0	0	0	0
P11.5_N	Pop 11	11	0	0	0	0	0	0	0	1	0	1	0	0	0	0	0	0	0	0	0	0	0	1	0	1	1	0	0	0	0	0	0	0	1	0	0	1	1	0	0	0	0	0	0	0	0	0	0
P11.6_N	Pop 11	11	0	0	0	0	0	0	0	0	0	0	0	0	0	0	0	0	0	0	0	0	0	1	0	1	1	0	0	0	0	0	0	0	1	0	0	1	1	0	0	0	0	0	0	0	0	0	0
P11.7_N	Pop 11	11	0	0	0	0	0	0	1	0	0	1	0	0	0	0	0	0	0	0	0	0	0	1	0	1	1	1	0	0	0	0	0	0	1	0	1	1	1	0	0	0	0	0	0	0	0	0	0
P11.8_N	Pop 11	11	0	0	0	0	0	1	0	0	0	1	0	0	0	0	0	0	0	0	0	0	0	1	1	1	1	1	0	0	0	0	0	0	1	0	0	1	1	0	0	1	0	0	0	0	0	0	0
P12.1_N	Pop 12	12	0	0	0	0	0	0	0	0	0	1	0	0	0	0	0	0	0	0	0	0	1	0	1	1	1	0	0	0	0	0	0	0	1	0	0	1	1	0	0	0	0	0	0	0	0	0	0
P12.2_N	Pop 12	12	0	0	0	0	0	0	0	0	0	1	0	0	0	0	0	0	0	0	0	0	1	0	1	1	1	0	0	0	0	0	0	0	1	0	0	0	1	0	0	0	0	0	0	0	0	0	0
P12.3_N	Pop 12	12	0	0	0	0	0	1	0	0	0	1	0	0	0	0	0	0	0	0	0	0	1	0	1	1	1	0	0	0	0	0	0	0	1	0	0	0	1	1	0	0	0	0	0	0	0	0	0
P12.4_N	Pop 12	12	0	0	0	0	0	0	0	0	0	1	0	0	0	0	0	0	0	0	0	0	1	0	1	1	1	0	0	0	0	0	0	0	1	0	1	0	1	0	1	0	0	0	0	0	0	0	0
P12.5_N	Pop 12	12	0	0	0	0	0	0	0	0	0	1	0	0	1	0	0	0	0	0	0	0	1	0	1	1	1	0	0	0	0	0	0	0	1	0	0	0	1	0	0	0	0	0	0	0	0	0	0
P12.6_N	Pop 12	12	0	0	0	0	0	0	0	0	0	1	0	0	0	0	0	0	0	0	0	0	1	1	1	1	1	0	0	0	0	0	0	0	1	0	0	0	1	0	0	0	0	0	0	0	0	0	0
P12.7_N	Pop 12	12	0	0	0	0	0	0	0	0	0	1	0	0	0	0	0	0	0	0	0	0	1	0	1	1	1	0	0	0	0	0	0	0	1	0	0	1	1	0	0	0	0	0	0	0	0	0	0
P12.8_N	Pop 12	12	0	0	0	0	0	0	0	0	0	1	0	0	0	0	0	0	0	0	0	0	1	1	1	1	1	0	0	0	0	0	0	0	1	0	0	0	1	0	0	0	0	0	0	0	0	0	0
P13.1_S	Pop 13	13	0	0	0	0	0	0	1	0	0	1	0	0	0	0	0	0	0	0	1	0	0	1	0	0	1	0	0	0	0	0	0	0	1	0	1	1	0	0	0	0	0	0	0	0	0	0	0
P13.2_S	Pop 13	13	0	0	0	0	0	0	1	0	0	1	0	0	0	0	0	0	0	0	0	0	0	1	0	0	1	0	0	0	0	0	0	0	1	0	1	1	0	0	1	0	0	0	0	0	0	0	0
P13.3_S	Pop 13	13	0	0	0	0	0	0	1	0	0	0	0	0	0	0	0	0	0	0	0	0	0	1	1	0	1	0	1	0	0	0	0	0	1	0	1	1	0	0	1	0	0	0	0	0	0	0	0
P13.4_S	Pop 13	13	0	0	0	0	0	0	1	0	0	1	0	0	0	0	0	0	0	0	0	0	1	1	0	0	1	0	0	0	0	0	0	0	1	0	1	1	0	0	0	0	0	0	0	0	0	0	0
P13.5_S	Pop 13	13	0	0	0	0	0	0	1	0	0	1	0	0	0	0	0	0	0	0	0	0	0	1	0	1	1	0	0	0	0	0	0	0	1	0	1	1	0	0	0	0	0	0	0	0	0	0	0
P13.6_S	Pop 13	13	0	0	0	0	0	0	1	0	0	0	0	0	0	0	0	0	0	0	0	0	0	1	0	0	1	0	0	0	0	0	0	0	1	0	1	1	0	0	0	0	0	0	0	0	0	0	0
P13.7_S	Pop 13	13	0	0	0	0	0	0	1	0	0	1	0	0	0	0	0	0	0	0	0	0	0	1	1	0	1	0	0	0	0	0	0	0	1	0	1	1	0	0	0	0	0	0	0	0	0	0	0
P13.8_S	Pop 13	13	0	0	0	0	0	0	1	0	0	1	0	0	0	0	0	0	0	0	0	0	0	1	1	0	1	0	0	0	0	0	0	0	1	0	1	1	0	0	0	0	0	0	0	0	0	0	0
P14.1_N	Pop 14	14	0	0	0	0	0	1	0	0	0	0	1	0	0	0	0	0	0	0	0	0	0	0	1	0	1	0	0	0	0	0	0	0	0	1	1	1	1	0	0	0	0	0	0	0	0	0	0
P14.2_N	Pop 14	14	0	0	0	0	0	1	0	0	0	0	1	0	0	0	0	0	0	0	0	0	0	0	1	0	1	0	0	0	0	0	0	0	0	1	0	1	1	0	0	0	0	0	0	0	0	0	0
P14.3_N	Pop 14	14	0	0	0	0	0	1	0	0	0	0	1	0	0	0	0	0	0	0	0	0	1	0	1	0	1	0	0	0	0	0	0	0	0	1	0	1	1	0	0	0	0	0	0	0	0	0	0
P14.4_N	Pop 14	14	0	0	0	0	0	1	0	0	0	0	1	0	0	0	0	0	0	0	0	0	0	0	1	0	1	0	0	0	0	0	0	0	0	1	0	1	0	0	0	0	0	0	0	0	0	0	0
P14.5_N	Pop 14	14	0	0	0	0	0	1	0	0	0	0	1	0	0	0	0	0	0	0	0	0	1	1	0	1	0	0	0	1	0	0	0	0	1	0	1	1	1	0	0	0	0	0	0	0	0	0	0
P14.6_N	Pop 14	14	0	0	0	0	0	1	0	0	0	0	1	0	0	0	0	0	0	0	0	0	0	0	1	0	1	0	0	0	0	0	0	0	0	1	0	1	0	0	0	0	0	0	0	0	0	0	0
P14.7_N	Pop 14	14	0	0	0	0	0	1	0	0	0	0	1	0	0	0	0	0	0	0	0	0	0	0	1	0	1	1	0	0	0	0	0	0	0	1	0	1	1	0	0	1	0	0	0	0	0	0	0
P14.8_N	Pop 14	14	0	0	0	0	0	1	0	0	0	0	1	0	0	0	0	0	0	0	0	0	0	0	1	0	1	1	0	0	0	0	0	0	0	1	0	1	1	0	0	1	0	0	0	0	0	0	0
P15.1_N	Pop 15	15	0	0	0	0	0	0	0	1	0	0	0	0	0	0	0	0	0	0	0	0	0	1	1	0	1	0	0	0	0	0	0	1	0	1	1	0	1	0	0	0	0	0	0	0	0	0	0
P15.2_N	Pop 15	15	0	0	0	0	0	0	0	1	0	0	0	0	0	0	0	0	0	0	0	0	0	1	1	0	1	0	0	0	0	0	0	1	0	1	1	0	1	0	0	0	0	0	0	0	0	0	0
P15.3_N	Pop 15	15	0	0	0	0	0	0	0	1	0	0	0	0	0	0	0	0	0	0	0	0	0	1	1	0	1	0	0	0	0	0	0	1	0	1	1	0	1	0	0	0	0	0	0	0	0	0	0
P15.4_N	Pop 15	15	0	0	0	0	0	0	0	1	0	0	0	0	0	0	0	0	0	0	0	0	0	1	1	0	1	0	0	0	0	0	0	1	0	0	1	0	1	0	0	0	0	0	0	0	0	0	0
P15.5_N	Pop 15	15	0	0	0	0	0	0	0	1	0	0	0	0	0	0	0	0	0	0	0	0	0	1	1	0	1	0	0	0	0	0	0	1	0	0	1	0	1	0	0	0	0	0	0	0	0	0	0
P15.6_N	Pop 15	15	0	0	0	0	0	0	0	1	0	0	0	0	0	0	0	0	0	0	0	0	0	1	1	0	0	0	0	0	0	0	0	1	0	1	1	0	1	0	0	0	0	0	0	0	0	0	0
P15.7_N	Pop 15	15	0	0	0	0	0	0	0	1	0	0	0	0	0	0	0	0	0	0	0	0	0	1	1	0	1	0	0	0	0	0	0	1	0	1	1	0	1	0	0	0	0	0	0	0	0	0	0
P15.8_N	Pop 15	15	0	0	0	0	0	0	0	1	0	0	0	0	0	0	0	0	0	0	0	0	0	1	1	0	1	0	0	0	0	0	0	1	0	1	1	0	1	0	0	0	0	0	0	0	0	0	0
P16.1_N	Pop 16	16	0	0	0	0	0	0	0	1	0	0	0	0	0	0	0	0	0	0	0	0	0	1	0	0	0	0	0	0	0	0	0	0	1	0	1	0	1	0	0	0	0	0	0	0	0	0	0
P16.2_N	Pop 16	16	0	0	0	0	0	0	0	1	0	0	0	0	0	0	0	0	0	0	0	0	0	1	0	0	0	0	0	0	0	0	0	0	1	0	0	0	1	0	0	0	0	0	0	0	0	0	0
P16.3_N	Pop 16	16	0	0	0	0	0	0	0	1	0	0	0	0	0	0	0	0	0	0	0	0	0	1	0	0	0	0	0	0	0	0	0	0	1	0	0	0	1	0	0	0	0	0	0	0	0	0	0
P16.4_N	Pop 16	16	0	0	0	0	0	0	0	1	0	0	0	0	0	0	0	0	0	0	0	0	0	1	0	0	0	0	0	0	0	0	0	0	1	0	0	0	1	0	0	0	0	0	0	0	0	0	0
P16.5_N	Pop 16	16	0	0	0	0	0	0	0	1	0	0	0	0	0	0	0	0	0	0	0	0	0	1	0	0	0	0	0	0	0	0	0	0	1	0	0	0	1	0	0	0	0	0	0	0	0	0	0
P16.6_N	Pop 16	16	0	0	0	0	0	0	0	1	0	0	0	0	0	0	0	0	0	0	0	0	0	1	0	0	0	0	0	0	0	0	0	0	1	0	0	0	1	0	0	0	0	0	0	0	0	0	0
P16.7_N	Pop 16	16	0	0	0	0	0	0	0	1	0	0	0	0	0	0	0	0	0	0	0	0	0	1	0	0	0	0	0	0	0	0	0	0	1	0	0	0	1	0	0	0	0	0	0	0	0	0	0
P16.8_N	Pop 16	16	0	0	0	0	0	0	0	1	0	0	0	0	0	0	0	0	0	0	0	0	0	1	0	0	0	0	0	0	0	0	0	0	1	0	1	0	1	0	0	0	0	0	0	0	0	0	0
[truncated: 65 more columns]
